# Supplementary material for: Achieving excitation wavelength–power-dependent colorful luminescence via multiplexing of dual lanthanides in fluorine oxide particles for multilevel anticounterfeiting
Source: Royal Society of Chemistry journal article supplement (doi:10.1039/d3dt01715j), 2023-01-01
Supplement: d3dt01715j1.pdf [file d3dt01715j1.pdf]

**Achieving Excitation Wavelength-Power-Dependent Colorful  
Luminescence via Multiplexing of Dual Lanthanides in Fluorine  
Oxide Particles for Multilevel Anticounterfeiting**

Chenyang Zhao<sup>a</sup>, Zikai Meng<sup>a</sup>, Zhen Guo<sup>a</sup>, Zhenbin Wang<sup>a,b,\*</sup>, Jiajia Cao<sup>a</sup>, Jihua Zhu<sup>a,b</sup>, Cunhua  
Ma<sup>a,b</sup>, Mingjin Zhang<sup>a,b\*</sup>, Weisheng Liu<sup>a,b,c\*</sup>

<sup>a</sup> School of Chemistry and Chemical Engineering, Qinghai Normal University, Xining 810008  
China

<sup>b</sup> Academy of Plateau Science and Sustainability, People's Government of Qinghai Province &  
Beijing Normal University, Xining, 810016, China

<sup>c</sup> Key Laboratory of Nonferrous Metal Chemistry and Resources Utilization of Gansu Province  
and State Key Laboratory of Applied Organic Chemistry, College of Chemistry and Chemical  
Engineering, Lanzhou University, Lanzhou, 730000, China

\*Corresponding author: wangzhibqnu@163.com

mingjinzh@126.com

liuws@lzu.edu.cn

Tel.: +86 / (0)971-5213524

Table S1. Atomic lattice occupied parameter of  $Y_7O_6F_9:Er^{3+},Eu^{3+}$ .

| Atom       | Wyckoff | $x/a$  | $y/b$  | $z/c$  | Fraction | $U_{iso}$ |
|------------|---------|--------|--------|--------|----------|-----------|
| $Y_{1/+3}$ | $8d$    | 0.7133 | 0.0359 | 0.25   | 1        | 0.025     |
| $Y_{1/+3}$ | $8d$    | 0.2931 | 0.1079 | 0.2855 | 1        | 0.025     |
| $Y_{1/+3}$ | $8d$    | 0.7118 | 0.1790 | 0.2350 | 1        | 0.025     |
| $Y_{1/+3}$ | $4c$    | 0.2909 | 1/4    | 0.2920 | 1        | 0.025     |
| $O_{1/-2}$ | $4b$    | 1/2    | 0      | 0.4700 | 1        | 0.025     |
| $O_{2/-2}$ | $8d$    | 0.4640 | 0.0719 | 0.0120 | 1        | 0.025     |
| $O_{3/-2}$ | $8d$    | 0.4690 | 0.1425 | 0.9920 | 1        | 0.025     |
| $O_{4/-2}$ | $8d$    | 0.4560 | 0.2169 | 0.0110 | 0.5      | 0.025     |
| $F_{1/-1}$ | $8d$    | 0.4560 | 0.2169 | 0.0110 | 0.5      | 0.025     |
| $F_{2/-1}$ | $4a$    | 0      | 0      | 0.0770 | 1        | 0.025     |
| $F_{3/-1}$ | $8d$    | 0.0360 | 0.0642 | 0.4220 | 1        | 0.025     |
| $F_{4/-1}$ | $8d$    | 0.9330 | 0.1300 | 0.1130 | 1        | 0.025     |
| $F_{5/-1}$ | $8d$    | 0.0870 | 0.1924 | 0.3800 | 1        | 0.025     |
| $F_{6/-1}$ | $4c$    | 0.8910 | 1/4    | 0.1670 | 1        | 0.025     |

Table S2. Four kinds of  $Y^{3+}$  coordination information and bond lengths of  $Y_7O_6F_9:Er^{3+},Eu^{3+}$ .

| $Y_1$      | $Y_2$      | $Y_3$          | $Y_4$          |
|------------|------------|----------------|----------------|
| $Y_1-O_1:$ | $Y_2-O_3:$ | $Y_3-O_3:$     | $Y_4-O_4/F_1:$ |
| $Y_1-O_2:$ | $Y_2-O_2:$ | $Y_3-F_5:$     | $Y_4-O_4/F_1:$ |
| $Y_1-F_1:$ | $Y_2-O_2:$ | $Y_3-O_4/F_1:$ | $Y_4-O_4/F_1:$ |
| $Y_1-F_1:$ | $Y_2-O_3:$ | $Y_3-F_5:$     | $Y_4-O_4/F_1:$ |
| $Y_1-O_2:$ | $Y_2-F_3:$ | $Y_3-F_4:$     | $Y_4-F_6:$     |
| $Y_1-O_1:$ | $Y_2-F_4:$ | $Y_3-O_3:$     | $Y_4-F_6:$     |
| —          | $Y_2-F_4:$ | $Y_3-O_4/F_1:$ | —              |
| Average:   | Average:   | Average:       | Average:       |

Table S3. Valence states, coordination numbers and ionic radii of matrix elements and doping ions.

| Ion | Charge | coordination | Ionis Radius |
|-----|--------|--------------|--------------|
| Y   | +3     | VI           | 0.90         |
|     |        | XII          | 0.96         |
| Eu  | +3     | VI           | 0.95         |
|     |        | XII          | 1.01         |
| Er  | +3     | VI           | 0.89         |
|     |        | XII          | 0.95         |

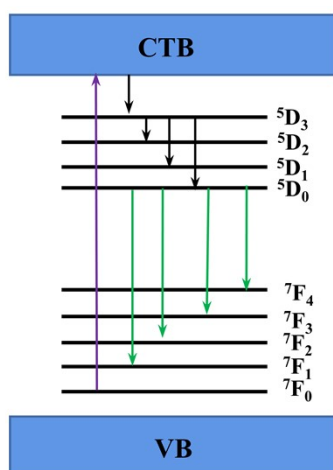

Figure S1. Schematic diagram of PersL mechanism of  $\text{Y}_7\text{O}_6\text{F}_9: \text{Eu}^{3+}$ .

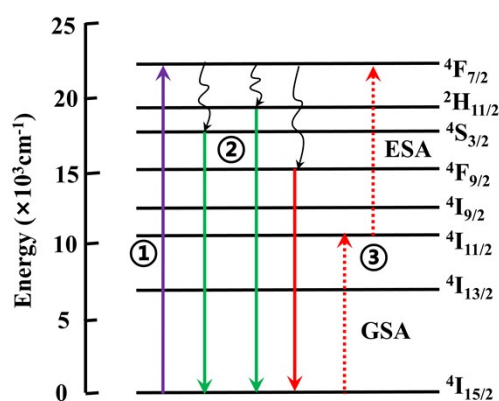

Figure S2. Energy level diagrams of  $\text{Er}^{3+}$ ,  $\text{Eu}^{3+}$  ions, as well as proposed UC mechanisms. Step ① and ② indicate photoluminescence process, and

step ② and ③ represent up-conversion luminescence process.

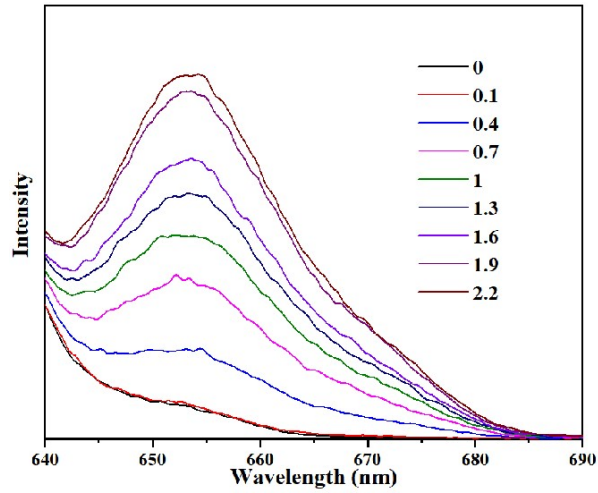

Figure S3. The emission spectra of  $Y_7O_6F_9:Er^{3+},Eu^{3+}$  with different 980 nm laser power under the excitation of 254 nm and 980 nm (650 – 700 nm).

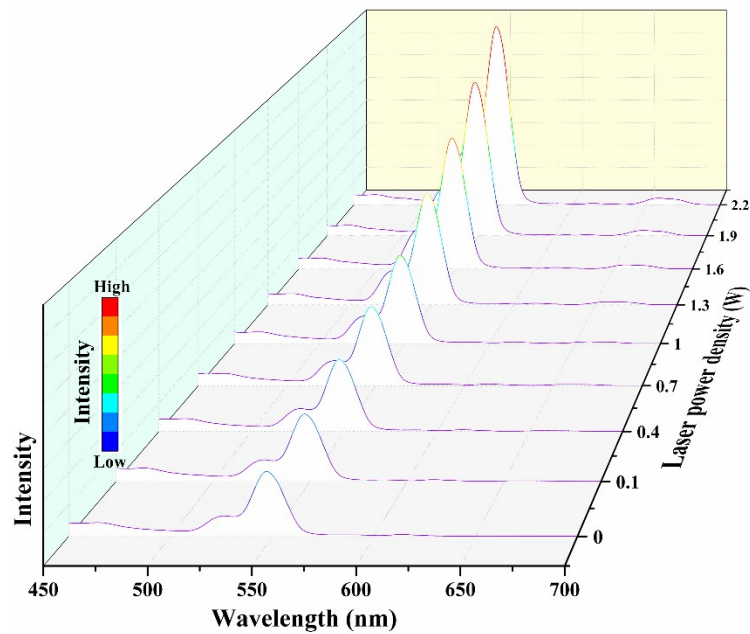

Figure S4. The emission spectra of  $Y_7O_6F_9:Er^{3+},Eu^{3+}$  with different power under the excitation of 365 nm and 980 nm.

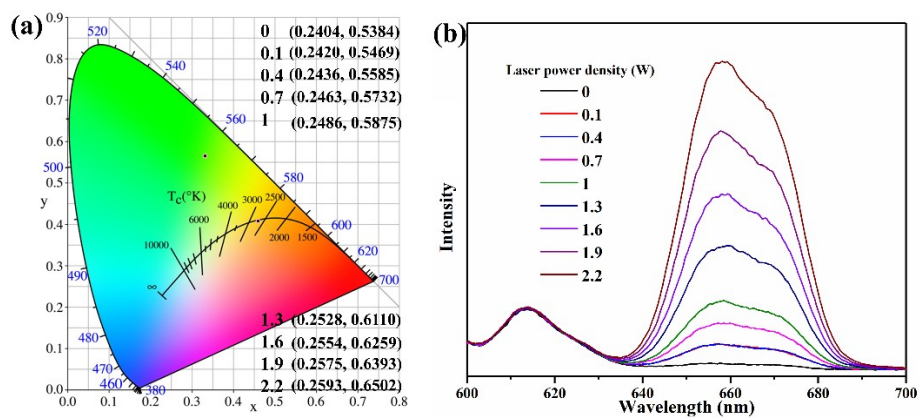

Figure S5. (a) The CIE coordinates. (b) The emission spectra under the simultaneous excitation of 365 nm and 980 nm (600 nm-700 nm).
